# Supplementary material
Source: publisher figshare collection journal article supplement (https://rs.figshare.com/ndownloader/files/12543653)
Supplement: Supplementary file 1 [file 12543653]

**Functional trait references – key for Dataset 3**

A: Dauvin and Bellan-Santini, (1990).

B: MarLIN BIOTIC trait database, (2006).

C: Thiel, (1998).

D: Aoki and Kikuchi, (1991).

E: Aoki, (1997).

F: Guerra-Garcia et al. (2014).

G: Scipione, (2013).

H: Mattson and Cedhagen, (1989).

I: Thiel, (1999).

J: Harrison, (1940).

K: Laval, (1980).

L: Svavarsson and Davidsdottir, (1995).

M: Legezynska et al. (2012).

N: Dixon and Moore, (1997).

O: Lewis, (1992).

P: Sainte-Marie, (1986).

Q: Oliver et al. (1982).

R: Oakden, (1984).

S: Dauby et al. (2001).

T: Borowsky, (1983).

U: Shillaker and Moore, (1987).

V: Nyssen et al. (2002).

W: Krishnan and John, (1974).

X: Dunbar, (1957).

Y: Bruce, (1986).

Z: Kaim-Malka, (1997).

A1: Soto and Mincarone, (2001).

B1: Svavarsson et al. (1993).

C1: Hessler and Stromberg, (1989).

D1: Poore and Bruce, (2012).

F1: Smit and Davies, (2004).

G1: Menzies, (1962).

H1: Sheader et al. (2000).

I1: Lorz, (2010).

J1: Dahl, (1964).

K1: Ansell, (1969).

L1: Kilgallen, (2010).

M1: Costello and Myers, (1987)

N1: Johansen and Vader, (2015).

O1: Cunha and Wilson, (2003).

P1: Harrison, (1987).

Q1: Wilson, (1976).

R1: George, (2004).

S1: Wurzberg et al. (2011).

T1: Blankenship and Levin, (2007).

U1: Blazewicz-Paszkowycz and Ligowski, (2004).

V1: Cartes et al. (2001).

W1: Sainte-Marie, (1992).

X1: De Broyer et al. (2004).

Y1: Dixon, (1944).

Z1: Bird and Holdich, (1985).

A2: Foxon, (1936).

B2: Hassack and Holdich, (1987).

C2: Gardiner, (1975).

D2: Johnson et al. (2001).

E2: Greve, (1967).

F2: Holdich and Jones, (1983).

G2: Reidenauer and Thistle, (1985).

H2: Thistle et al. (1985).

I2: Holdich and Bird, (1986).

J2: Buhl-Mortensen et al. (2016).

K2: Coleman, (1989).

L2: Barnard and Karaman, (1991a, 1991b).

M2: Coleman, (1998).

N2: Jones, (1948).

O2: Poulin and Hamilton, (1995).

P2: Lincoln, (1979).

Q2: Schultz, (1969).

R2: Frutos et al. (2011).

S2: Larsen, (2007).

T2: Larsen, (2011).

U2: Bird, (2007).

V2: McLelland, (2008).

W2: Guerrero Kommritz, (2004).

X2: Blazewicz-Paszkowycz, (2005).

Y2: Gutu, (1980).

Z2: Muradian-Ciamician, (1980).

A3: Ariyama, (1996).

B3: Kim and Lee, (2010).

C3: Bird and Holdich, (1988).

D3: Stoddart and Lowry, (2012).

E3: Bousfield and Hendrycks, (1997).

F3: White, (2011).

G3: Tandberg et al. (2012).

H3: D’Udekem D’Acoz, (2006).

I3: Bousfield and Hendrycks, (1995).

J3: Just, (2013).

K3: Enequist, (1949).

L3: Sainte-Marie, (1991).

M3: Bousfield, (1982).

N3: Riehl et al. (2016).

O3: Aumack et al. (2016).

**Literature cited**

ANSELL, A. D. 1969. Association of the amphipod *Acidostoma neglectum* Dahl with the anthozoan *Peachia hastata* Gosse. *Journal of Natural History,* 3**,** 345-347.

AOKI, M. N. 1997. Comparative study of mother-young association in caprellid amphipods: is maternal care effective? *Journal of Crustacean Biology,* 17**,** 447-458.

AOKI, M. N. & KIKUCHI, T. 1991. Two types of maternal care for juveniles observed in Caprella monoceros Mayer, 1890 and Caprella decipiens Mayer, 1890 (Amphipoda: Caprellidae). *In:* WATLING, L. (ed.) *VIIth International Colloquium on Amphipoda: Proceedings of the VIIth International Colloquium on Amphipoda held in Walpole, Maine, USA, 14–16 September 1990.* Dordrecht: Springer Netherlands.

ARIYAMA, H. 1996. Four species of the genus *Grandidierella* (Crustacea: Amphipoda: Aoridae) from Osaka Bay and the northern part of the Kii Channel, central Japan. *Publications of the Seto Marine Biological Laboratory,* 37**,** 167-191.

AUMACK, C. F., LOWE, A. T., AMSLER, C. D., AMSLER, M. O., MCCLINTOCK, J. B. & BAKER, B. J. 2016. Gut content, fatty acid, and stable isotope analyses reveal dietary sources of macroalgal-associated amphipods along the western Antarctic Peninsula. *Polar Biology***,** 1-14.

BARNARD, J. L. & KARAMAN, G. S. 1991a. The families and genera of marine gammaridean Amphipoda (except marine gammaroids). Part 1. *Records of the Australian Museum,* Supplement 13**,** 1-417.

BARNARD, J. L. & KARAMAN, G. S. 1991b. The families and genera of marine gammaridean Amphipoda (except marine gammaroids). Part 2. *Records of the Australian Museum,* Supplement 13**,** 419-866.

BIRD, G. J. 2007. Families Anarthruridae Lang, 1971, Colletteidae Larsen & Wilson, 2002, and Leptognathiidae Sieg, 1976*. *Zootaxa,* 1599**,** 61-85.

BIRD, G. J. & HOLDICH, D. M. 1985. A remarkable tubicolous tanaid (Crustacea: Tanaidacea) from the Rockall Trough. *Journal of the Marine Biological Association of the United Kingdom,* 65**,** 563-572.

BIRD, G. J. & HOLDICH, D. M. 1988. Deep-sea Tanaidacea (Crustacea) of the North-east Atlantic: the tribe Agathotanaini. *Journal of Natural History,* 22**,** 1591-1621.

BLANKENSHIP, L. E. & LEVIN, L. A. 2007. Extreme food webs: foraging strategies and diets of scavenging amphipods from the ocean’s deepest 5 kilometers. *Limnology and Oceanography,* 52**,** 1685-1697.

BLAZEWICZ-PASZKOWYCZ, M. & LIGOWSKI, R. 2004. Diatoms as food source indicator for some Antarctic Cumacea and Tanaidacea (Crustacea). *Antarctic Science,* 14**,** 11-15.

BOROWSKY, B. 1983. Reproductive behavior of three tube-building peracarid crustaceans: the amphipods *Jassa falcata* and *Ampithoe valida* and the tanaid *Tanais cavolinii*. *Marine Biology,* 77**,** 257-263.

BOUSFIELD, E. L. 1982. Amphipoda. *In:* PARKER, S. P. (ed.) *Synopsis and classification of living organisms.* New York, USA: McGraw-Hill Book Company.

BOUSFIELD, E. L. & HENDRYCKS, E. A. 1995. The amphipod family Pleustidae on the Pacific coast of North America. Part III. Subfamilies Parapleustinae, Dactylopleustinae, and Pleusirinae: systematics and distributional ecology. *Amphipacifica,* 2**,** 65-133.

BOUSFIELD, E. L. & HENDRYCKS, E. A. 1997. The Amphipod Superfamily Eusiroidea in the North American Pacific Region. II. Family Calliopiiidae. Systematics and Distributional Ecology. *Amphipacifica,* 2**,** 3-66.

BRUCE, N. L. 1986. *Cirolanidae (Crustacea: Isopoda) of Australia,* Darlinghurst, Australia, Australian Museum.

BUHL-MORTENSEN, L., TANDBERG, A. H., BUHL-MORTENSEN, P. & GATES, A. R. 2016. Behaviour and habitat of *Neohela monstrosa* (Boeck, 1861) (Amphipoda: Corophiida) in Norwegian Sea deep water. *Journal of Natural History,* 50**,** 323-337.

BŁAŻEWICZ-PASZKOWYCZ, M. 2005. N. Gen., N. Sp. (Tanaidacea: Tanaidomorpha) from Antarctic Abyssal Waters. *Journal of Crustacean Biology,* 25**,** 75-80.

CARTES, J. E., ELIZALDE, M. & SORBE, J. C. 2001. Contrasting life-histories, secondary production, and trophic structure of Peracarid assemblages of the bathyal suprabenthos from the Bay of Biscay (NE Atlantic) and the Catalan Sea (NW Mediterranean). *Deep Sea Research Part I: Oceanographic Research Papers,* 48**,** 2209-2232.

COLEMAN, C. O. 1989. Burrowing, grooming, and feeding behaviour of *Paraceradocus*, an antarctic amphipod genus (Crustacea). *Polar Biology,* 10**,** 43-48.

COLEMAN, C. O. 1998. *Amathillopsis charlottae* n. sp., first record of Amathillopsidae (Crustacea, Amphipoda) from the Antarctic Ocean. *Bulletin Zoologisch Museum,* 16**,** 25-31.

COSTELLO, M. J. & MYERS, A. A. 1987. Amphipod fauna of the sponges *Halichondria panicea* and *Hymeniacidon perleve* in Lough Hyne, Ireland. *Marine Ecology Progress Series,* 41**,** 115-121.

CUNHA, M. R. & WILSON, G. D. F. 2003. Haplomunnidae (Crustacea: Isopoda) reviewed, with a description of an intact specimen of *Thylakogaster* Wilson & Hessler, 1974. *Zootaxa,* 326**,** 1-16.

D'UDEKEM D'ACOZ, C. 2006. On a new *Melphidippa* species from Svalbard (Amphipoda, Melphidippidae). *Crustaceana,* 79**,** 489-499.

DAHL, E. 1964. The amphipod genus *Acidostoma*. *In:* BOSCHMA, H. (ed.) *Feestbundel.* Leiden, Netherlands: E.J.Brill.

DAUBY, P., SCAILTEUR, Y. & DE BROYER, C. 2001. Trophic diversity within the eastern Weddell Sea amphipod community. *Hydrobiologia,* 443**,** 69-86.

DAUVIN, J.-C. & BELLAN-SANTINI, D. 1990. An overview of the amphipod genus Haploops (Ampeliscidae). *Journal of the Marine Biological Association of the United Kingdom,* 70**,** 887-903.

DE BROYER, C., NYSSEN, F. & DAUBY, P. 2004. The crustacean scavenger guild in Antarctic shelf, bathyal and abyssal communities. *Deep Sea Research Part II: Topical Studies in Oceanography,* 51**,** 1733-1752.

DIXON, A. Y. 1944. Notes on certain aspects of the biology of *Cumopsis goodsiri* (Van Beneden) and some other cumaceans in relation to their environment. *Journal of the Marine Biological Association of the United Kingdom,* 26**,** 61-71.

DIXON, I. M. T. & MOORE, P. G. 1997. A comparative study on the tubes and feeding behaviour of eight species of corophioid Amphipoda and their bearing on phylogenetic relationships within the Corophioidea. *Philosophical Transactions of the Royal Society of London. Series B: Biological Sciences,* 352**,** 93-112.

DUNBAR, M. J. 1957. The determinants of production in the northern seas: a study of the biology of *Themisto libellula* Mandt. *Canadian Journal of Zoology,* 35**,** 797-819.

ENEQUIST, P. 1949. *Studies on the soft-bottom amphipods of the Skagerak,* Stockholm, Sweden, Almquist & Wiksell.

FOXON, G. E. H. 1936. XXXVII.—Notes on the natural history of certain sanddwelling Cumacea. *Journal of Natural History,* 17**,** 377-393.

FRUTOS, I., SORBE, J. C. & JUNOY, J. 2011. The first blind *Paranthura* species (Crustacea, Isopoda, Paranthuridae) from the'El Cachucho'Marine Protected Area (Le Danois Bank, southern Bay of Biscay). *Zootaxa,* 2971**,** 17-32.

GARDINER, L. F. 1975. The systematics, postmarsupial development, and ecology of the deep-sea family Neotanaidae (Crustacea: Tanaidacea). *Smithsonian Contributions to Zoology,* 170**,** 1-265.

GEORGE, R. Y. 2004. Janirellidae and Dendrotionidae (Crustacea: Isopoda: Asellota) from bathyal and abyssal depths off North Carolina and their evolution. *Travaux du Muséum National d’Histoire Naturelle Grigore Antipa,* 47**,** 43-73.

GREVE, L. 1967. On the tube building of some Tanaidacea. *Sarsia,* 29**,** 295-298.

GUERRA-GARCÍA, J. M., TIERNO DE FIGUEROA, J. M., NAVARRO-BARRANCO, C., ROS, M., SÁNCHEZ-MOYANO, J. E. & MOREIRA, J. 2014. Dietary analysis of the marine Amphipoda (Crustacea: Peracarida) from the Iberian Peninsula. *Journal of Sea Research,* 85**,** 508-517.

GUERRERO KOMMRITZ, J. 2004. *Systematik, Phylogenie und Zoogeographie von Tiefsee-Tanaidacea (Crustacea, Malacostraca) des Atlantiks am Beispiel ausgewählter Taxa.* PhD, Universitat Hamburg.

GUTU, M. 1980. *Pseudosphyrapus*, a new genus of a new family (Sphyrapidae) of Monokonophora (Crustacea, Tanaidacea). *Travaux du Muséum National d’Histoire Naturelle Grigore Antipa,* 22**,** 393-400.

HARRISON, K. 1987. Deep-sea asellote isopods of the north-east Atlantic: the family Thambematidae. *Zoologica Scripta,* 16**,** 51-72.

HARRISON, R. J. 1940. On the Biology of the Caprellidae. Growth and moulting of *Pseudoprotella phasma* Montagu. *Journal of the Marine Biological Association of the United Kingdom,* 24**,** 483-493.

HASSACK, E. & HOLDICH, D. M. 1987. The tubicolous habit amongst the Tanaidacea (Crustacea, Peracarida) with particular reference to deep-sea species. *Zoologica Scripta,* 16**,** 223-233.

HESSLER, R. R. & STRÖMBERG, J.-O. 1989. Behavior of janiroidean isopods (Asellota), with special reference to deep-sea genera. *Sarsia,* 74**,** 145-159.

HOLDICH, D. M. & BIRD, G. J. 1986. Tanaidacea (Crustacea) from sublittoral waters off West Scotland, including the description of two new genera. *Journal of Natural History,* 20**,** 79-100.

HOLDICH, D. M. & JONES, J. A. 1983. The distribution and ecology of British shallow-water tanaid crustaceans (Peracarida, Tanaidacea). *Journal of Natural History,* 17**,** 157-183.

JOHANSEN, P.-O. & VADER, W. 2015. New and little known species of *Lepechinella* (Crustacea, Amphipoda, Lepechinellidae) and an allied new genus *Lepesubchela* from the North Atlantic. *European Journal of Taxonomy,* 127**,** 1-35.

JOHNSON, W. S., STEVENS, M. & WATLING, L. 2001. Reproduction and development of marine peracaridans. *Advances in marine biology,* 39**,** 105-260.

JONES, N. S. 1948. The ecology of the Amphipoda of the south of the Isle of Man. *Journal of the Marine Biological Association of the United Kingdom,* 27**,** 400-439.

JUST, J. 2013. *Metopa gigas* sp. nov. from southern Greenland, a giant among congeners (Crustacea, Amphipoda, Stenothoidae). *Zootaxa,* 3641**,** 289-295.

KAÏM-MALKA, R. A. 1997. Biology and life cycle of *Natatolana borealis* Lilj. 1851, a scavenging isopod from the continental slope of the Mediterranean. *Deep Sea Research Part I: Oceanographic Research Papers,* 44**,** 2045-2067.

KILGALLEN, N. M. 2010. A new Antarctic species of *Aristias* Boeck (Crustacea, Amphipoda, Aristiidae), with remarks on the genus in Antarctica. *Zootaxa,* 2426**,** 43-53.

KIM, Y.-H. & LEE, K.-S. 2010. *Gammaropsis utinomii* New to Korea (Crustacea: Amphipoda: Photidae). *Animal Systematics, Evolution and Diversity,* 26**,** 165-170.

KRISHNAN, L. & JOHN, P. A. 1974. Observations on the breeding biology of *Melita zeylanica* stebbing, a brackish water amphipod. *Hydrobiologia,* 44**,** 413-430.

LARSEN, K. 2007. Family Agathotanaidae Lang, 1971a*. *Zootaxa,* 1599**,** 41-60.

LARSEN, K. 2011. Tanaidaceans (Crustacea) from the Central Pacific Manganese Nodule Province. I. The genera *Collettea*, *Robustochelia* and *Tumidochelia*. *ZooKeys,* 87**,** 19-41.

LAVAL, P. 1980. Hyperiid amphipods as crustacean parasitoids associated with gelatinous zooplankton. *Oceanography and Marine Biology, an Annual Review,* 18**,** 11-56.

LEGEŻYŃSKA, J., KĘDRA, M. & WALKUSZ, W. 2012. When season does not matter: summer and winter trophic ecology of Arctic amphipods. *Hydrobiologia,* 684**,** 189-214.

LEWIS, J. B. 1992. Abundance, distribution and behavior of a commensal amphipod *Stenothoe valida* Dana on the hydrocoral *Millepora complanata* Lamarck. *Bulletin of Marine Science,* 51**,** 245-249.

LINCOLN, R. J. 1979. *British marine amphipoda: Gammaridea,* London, UK, British Museum (Natural History).

LÖRZ, A.-N. 2010. Trench treasures: the genus *Princaxelia* (Pardaliscidae, Amphipoda). *Zoologica baetica,* 21**,** 65-84.

MARLIN. 2006. *Biological traits information catalogue* [Online]. Plymouth: Marine Biological Association of the United Kingdom. Available: [www.marlin.ac.uk/biotic](file:///C:\Users\Oliver\Documents\Oxford%20D.Phil\NEREIDA%20files\Data\Biological%20data\Diversity%20evenness%20and%20richness%20data\Functional%20diversity\References\www.marlin.ac.uk\biotic) [Accessed September 2016].

MATTSON, S. & CEDHAGEN, T. 1989. Aspects of the behaviour and ecology of *Dyopedos monacanthus* (Metzger) and *D. porrectus* Bate, with comparative notes on *Dulichia tuberculata* Boeck (Crustacea: Amphipoda: Podoceridae). *Journal of Experimental Marine Biology and Ecology,* 127**,** 253-272.

MCLELLAND, J. A. 2008. *A systematic and taxonomic review of the family Pseudotanaidae (Crustacea: Peracarida: Tanaidacea) based primarily on morphometric cladistic analyses.* Doctor of Philosophy, University of Southern Mississippi.

MENZIES, R. J. 1962. On the food and feeding habits of abyssal organisms as exemplified by the Isopoda. *Internationale Revue der gesamten Hydrobiologie und Hydrographie,* 47**,** 339-358.

MURADIAN-CIAMICIAN, Z. 1980. On some species belonging to the genus *Campylaspis* (Cumacea, Nannastacidae) from the collections of the Natural History Museum Grigore Antipa. *Travaux du Muséum d’Histoire Naturelle Grigore Antipa,* 21**,** 73-88.

NYSSEN, F., BREY, T., LEPOINT, G., BOUQUEGNEAU, J.-M., DE BROYER, C. & DAUBY, P. 2002. A stable isotope approach to the eastern Weddell Sea trophic web: focus on benthic amphipods. *Polar Biology,* 25**,** 280-287.

OAKDEN, J. M. 1984. Feeding and substrate preference in five species of phoxocephalid amphipods from central California. *Journal of Crustacean Biology,* 4**,** 233-247.

OLIVER, J. S., OAKDEN, J. M. & SLATTERY, P. N. 1982. Phoxocephalid amphipod crustaceans as predators on larvae and juveniles in marine soft-bottom communities. *Marine ecology progress series,* 7**,** 179-184.

POORE, G. C. B. & BRUCE, N. L. 2012. Global diversity of marine isopods (except Asellota and crustacean symbionts). *PLoS One,* 7**,** e43529.

POULIN, R. & HAMILTON, W. J. 1995. Ecological determinants of body size and clutch size in amphipods: a comparative approach. *Functional Ecology,* 9**,** 364-370.

REIDENAUER, J. A. & THISTLE, D. 1985. The tanaid fauna from a region of the deep north-atlantic where near-bottom current velocities are high. *Oceanologica Acta,* 8**,** 355-360.

RIEHL, T., BOBER, S., VOLTSKI, I., MALYUTINA, M. V. & BRANDT, A. 2016. Caught in the act: an abyssal isopod collected while feeding on Komokiaceae. *Marine Biodiversity***,** 1-2.

SAINTE-MARIE, B. 1986. Feeding and swimming of lysianassid amphipods in a shallow cold-water bay. *Marine Biology,* 91**,** 219-229.

SAINTE-MARIE, B. 1991. A review of the reproductive bionomics of aquatic gammaridean amphipods: variation of life history traits with latitude, depth, salinity and superfamily. *Hydrobiologia,* 223**,** 189-227.

SAINTE-MARIE, B. 1992. Foraging of scavenging deep-sea lysianassoid amphipods. *In:* ROWE, G. T. & PARIENTE, V. (eds.) *Deep-Sea Food Chains and the Global Carbon Cycle.* Dordrecht: Springer Netherlands.

SCHULTZ, G. A. 1969. *How to know the marine isopod crustaceans,* Dubuque, USA, WM. C. Brown Company Publishers.

SCIPIONE, M. B. 2013. Do studies of functional groups give more insight to amphipod biodiversity? *Crustaceana,* 86**,** 955-1006.

SHEADER, M., VAN DOVER, C. L. & SHANK, T. M. 2000. Structure and function of *Halice hesmonectes* (Amphipoda: Pardaliscidae) swarms from hydrothermal vents in the eastern Pacific. *Marine Biology,* 136**,** 901-911.

SHILLAKER, R. O. & MOORE, P. G. 1987. The biology of brooding in the amphipods *Lembos websteri* Bate and *Corophium bonnellii* Milne Edwards. *Journal of Experimental Marine Biology and Ecology,* 110**,** 113-132.

SMIT, N. J. & DAVIES, A. J. 2004. The curious life-style of the parasitic stages of gnathiid isopods. *Advances in Parasitology,* 58**,** 289-391.

SOTO, J. M. R. & MINCARONE, M. M. 2001. Distribution and morphology of the giant isopods *Bathynomus giganteus* and *Bathynomus miyarei* (Flabellifera, Cirolanidae) off southern Brazil. *Mare Magnum,* 1**,** 141-145.

STODDART, H. E. & LOWRY, J. K. 2012. Revision of the lysianassoid genera *Acidostoma* and *Shackletonia* (Crustacea: Amphipoda: Acidostomatidae fam. nov.). *Zootaxa,* 3307**,** 1-34.

SVAVARSSON, J. & DAVÍDSDÓTTIR, B. 1995. *Cibicides spp*. (Protozoa, Foraminifera) as epizoites on the Arctic antenna-brooding *Arcturus baffini* (Crustacea, Isopoda, Valvifera). *Polar Biology,* 15**,** 569-574.

SVAVARSSON, J., GUDMUNDSSON, G. & BRATTEGARD, T. 1993. Feeding by asellote isopods (Crustacea) on foraminifers (Protozoa) in the deep sea. *Deep Sea Research Part I: Oceanographic Research Papers,* 40**,** 1225-1239.

TANDBERG, A. H., RAPP, H. T., SCHANDER, C., VADER, W., SWEETMAN, A. K. & BERGE, J. 2012. *Exitomelita sigynae* gen. et sp. nov.: a new amphipod from the Arctic Loki Castle vent field with potential gill ectosymbionts. *Polar Biology,* 35**,** 705-716.

THIEL, M. 1998. Extended parental care in marine amphipods. I. Juvenile survival without parents. *Journal of Experimental Marine Biology and Ecology,* 227**,** 187-201.

THIEL, M. 1999. Extended parental care in marine amphipods: II. Maternal protection of juveniles from predation. *Journal of Experimental Marine Biology and Ecology,* 234**,** 235-253.

THISTLE, D., YINGST, J. Y. & FAUCHALD, K. 1985. A deep-sea benthic community exposed to strong near-bottom currents on the Scotian Rise (western Atlantic). *Marine Geology,* 66**,** 91-112.

WHITE, K. N. 2011. A taxonomic review of the Leucothoidae (Crustacea: Amphipoda). *Zootaxa,* 3078**,** 1-113.

WILSON, G. D. F. 1976. The systematics and evolution of *Haplomunna* and its relatives (Isopoda, Haplomunnidae, New family). *Journal of Natural History,* 10**,** 569-580.

WÜRZBERG, L., PETERS, J. & BRANDT, A. 2011. Fatty acid patterns of Southern Ocean shelf and deep sea peracarid crustaceans and a possible food source, foraminiferans. *Deep Sea Research Part II: Topical Studies in Oceanography,* 58**,** 2027-2035.
